# Supplementary material for: The combined effect of light irradiation and chloride on the physicochemical properties of silver nanoparticles
Source: Royal Society of Chemistry journal article supplement (doi:10.1039/c9ra09261g), 2019-12-24
Supplement: c9ra09261g1.pdf [file c9ra09261g1.pdf]

# Supporting information for “The combined effect of light irradiation and chloride on the physicochemical properties of silver nanoparticles”

*Bojie Yuan, Minghao Sui\*, Hongtao Lu, Jingyu Wang, Jie Qin*

Shanghai institute of pollution control and ecological security, Shanghai Institute of Pollution Control and Ecological Security, State Key Laboratory of Pollution Control and Resource Reuse, School of Environmental Science and Engineering, Tongji University, 1239 Siping Road, Shanghai 200092, People's Republic of China.

\*Corresponding author: Tel: +86-21-65982691; Fax: +86-21-65986313, E-mail address: minghaosui@tongji.edu.cn

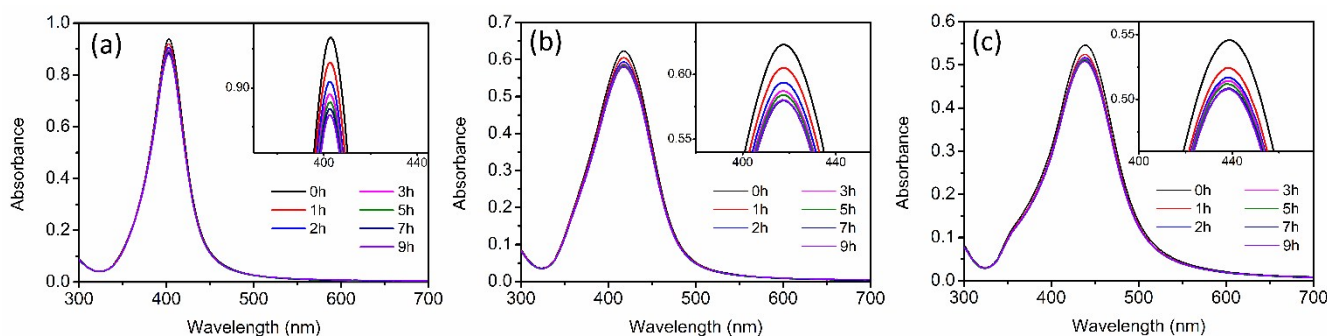

**Figure S1.** UV-vis spectrum of Ag NPs (nAg-20 (a), nAg-40 (b), nAg-57 (c)) over time during dark treatment in 0.5 mM NaCl.

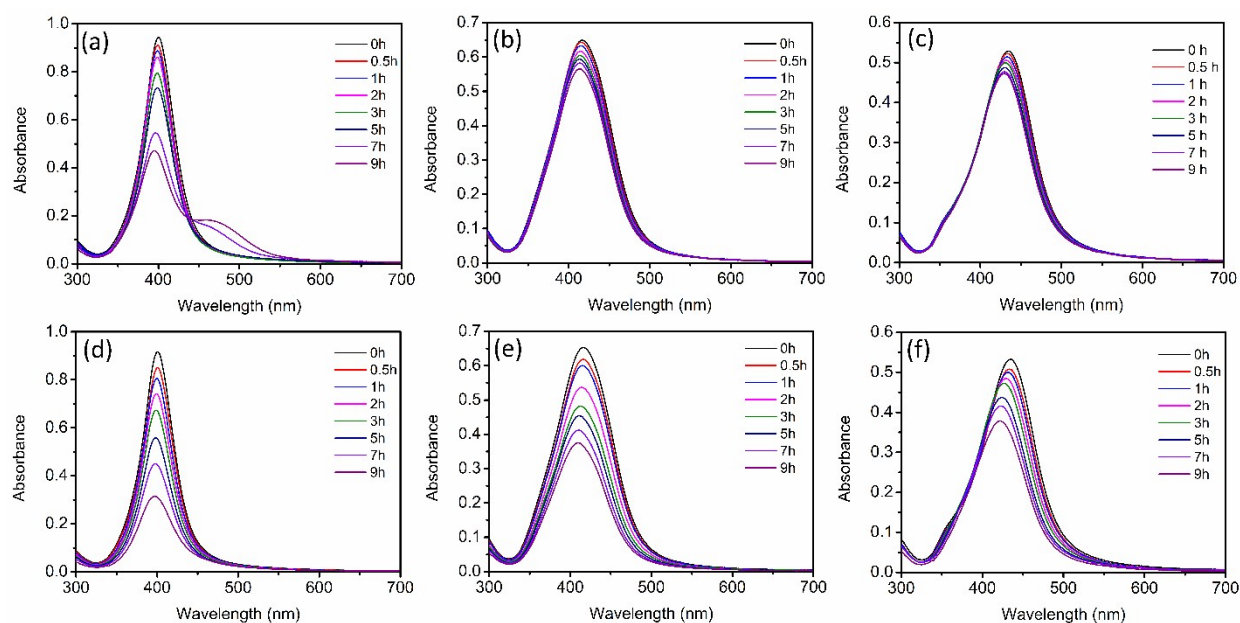

**Figure S2.** UV-vis spectrum of Ag NPs (nAg-20 (a, d), nAg-40 (b, e), nAg-57 (c, f)) over time during light irradiation in ultrapure water (a, b, c) and 0.5 mM  $\text{NaNO}_3$  (d, e, f).

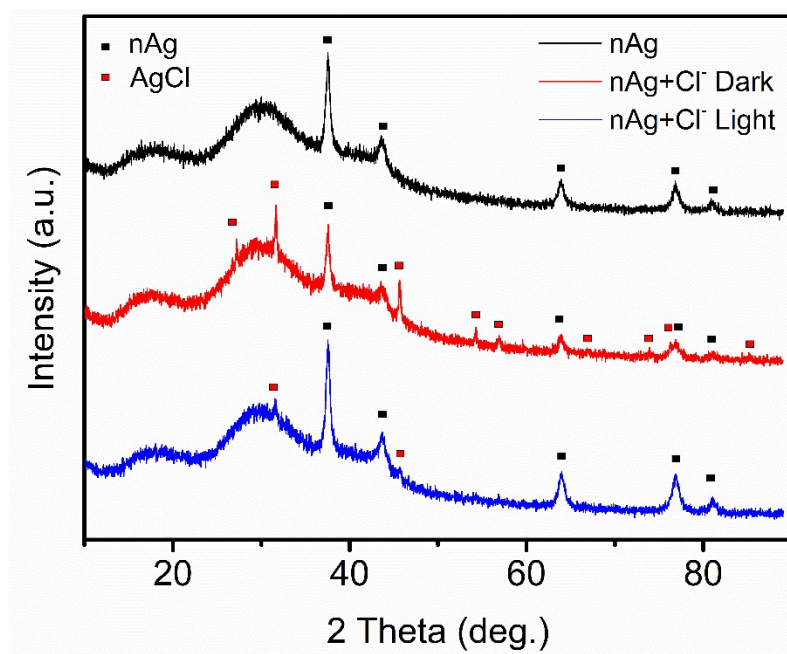

**Figure S3.** XRD patterns of Ag NPs without treating with  $\text{Cl}^-$  (up); XRD patterns of Ag NPs (500  $\mu\text{M}$ ) after treating with  $\text{Cl}^-$  (10 mM) in dark (middle) and light (down) for 9 h.

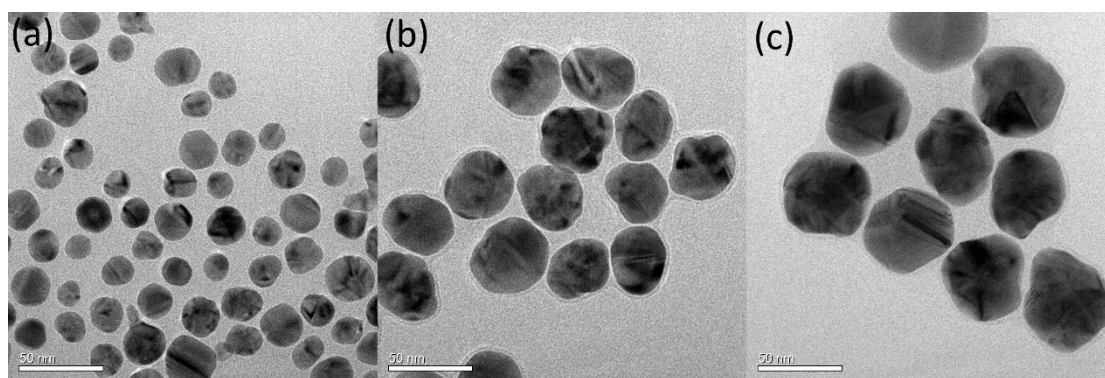

**Figure S4.** TEM images of Ag NPs (nAg-20 (a), nAg-40 (b), and nAg-57 (c)) after 9 h of dark treatment in 0.5 mM NaCl.

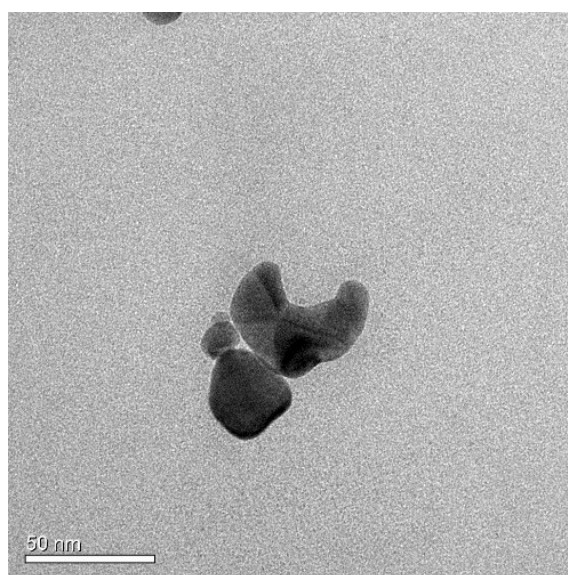

**Figure S5.** TEM image of nAg-57 after treating with H<sub>2</sub>O<sub>2</sub>.

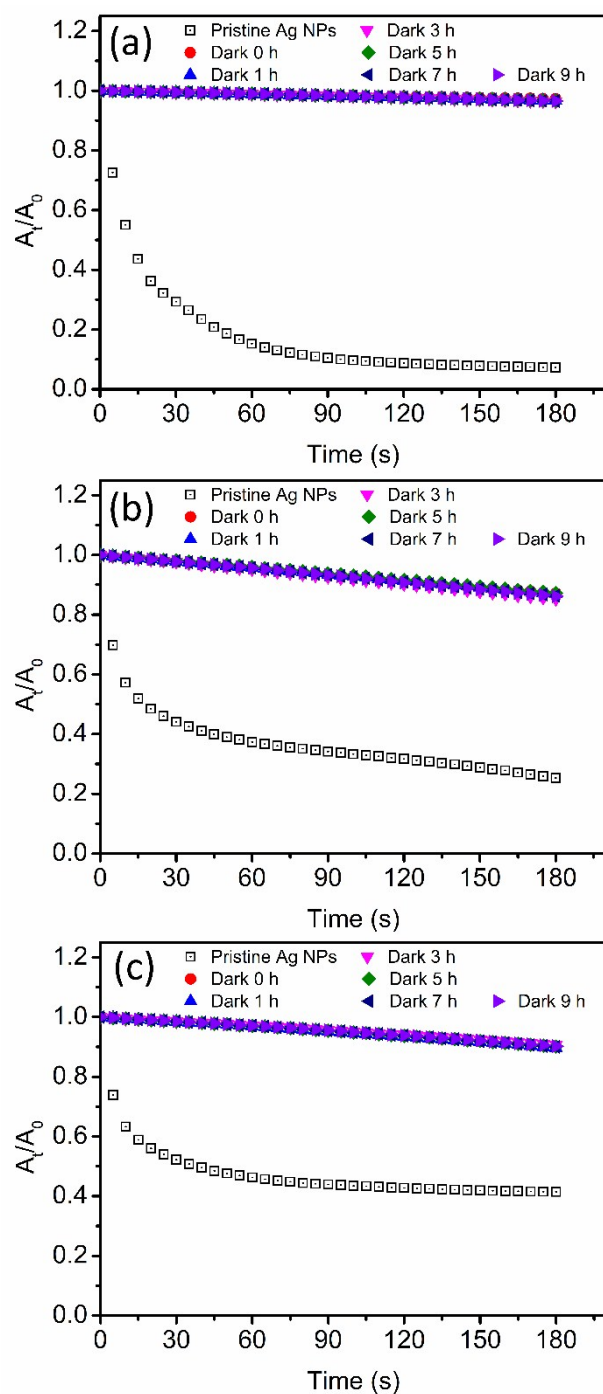

**Figure S6.** The decrease rate of Ag NPs (nAg-20 (a), nAg-40 (b), nAg-57 (c)) absorbance ( $A_t/A_0$ ) with time after introducing  $H_2O_2$  (200 g/L), where  $A_0$  was the initial absorbance of Ag NPs at the maximum absorption wavelength,  $A_t$  was the absorbance of Ag NPs at time. Before the introduction of  $H_2O_2$ , Ag NPs was incubated with 0.5 mM  $Cl^-$  in dark conditions.
